# Supplementary material
Source: Springer Nature journal article supplement (https://www.springermedizin.de/resource/supplementary/13256_2011_2318_MOESM1_ESM.pdf/9649332)

Brilliance 64  
Ex: 17915  
Se: 2  
Im: 41  
DFOV 402.0 mm

A

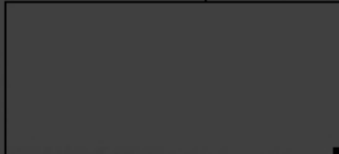

R

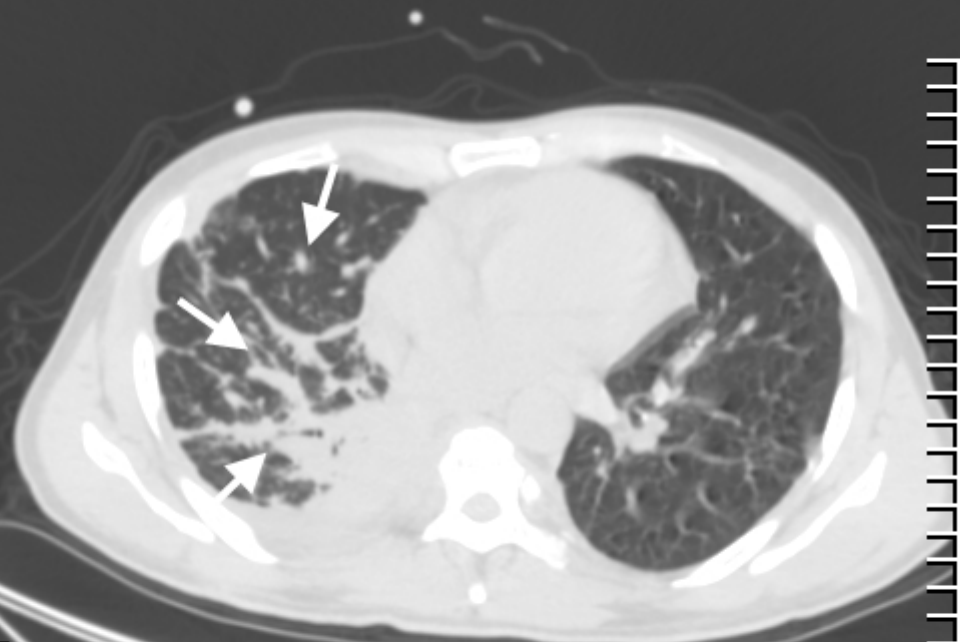

L

kV 120.0  
mA: 283  
2.0 mm  
Tilt: 0.0 degrees

13:11:07  
W=1600,L=-600

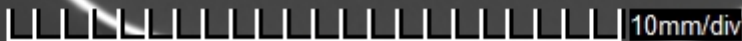

P

Supplement: MOESM1 [file 9649332]
